# Supplementary material
Source: publisher figshare collection journal article supplement (https://karger.figshare.com/ndownloader/files/23582423)
Supplement: Supplementary file 1 [file 23582423]

**S1 Word.** The full search algorithm.

**S2 Table.** The extracted data of each study.

**S3 Table.** The Cochrane Q test. The scale scores of each study.
